# Supplementary material
Source: PubMed Central journal article supplement (PMC9063901)
Supplement: ASN.2021101327SupplementaryData.pdf [file ASN.2021101327SupplementaryData.pdf]

## **Supplemental Table of Contents**

Supplementary Table 1: Search Strategy

Supplementary Table 2: Risk of bias assessment for randomized controlled trials

Supplementary Table 1. Search Strategy

Ovid MEDLINE(R) <1946 to October 8, 2021> and Embase Classic + Embase <1947 to October 8, 2021)

- 1 exp Renal insufficiency, Chronic/
- 2 (chronic kidney disease\* or CKD or chronic renal disease\* or chronic kidney failure or chronic renal failure or end-stage renal disease or h?emodialysis patient\$.mp.
- 3 1 or 2
- 4 (vascular calcification or arter\* calcification or aortic calcification or coronary calcification or coronary artery calcification or valv\* calcification).mp.
- 5 exp vascular calcification/
- 6 4 or 5
- 7 3 and 6

Supplementary Table 2: Risk of bias assessment for randomized controlled trials

| Author and year<br>(Landmark study)           | Random<br>sequence<br>generation | Allocation<br>concealment | Blinding                                        |                                     | Incomplete outcome data<br>addressed (attrition)                     | Lack of<br>selective<br>outcome<br>reporting | Lack of other<br>sources of bias                        | Overall evaluation                                                                          |
|-----------------------------------------------|----------------------------------|---------------------------|-------------------------------------------------|-------------------------------------|----------------------------------------------------------------------|----------------------------------------------|---------------------------------------------------------|---------------------------------------------------------------------------------------------|
|                                               |                                  |                           | Participants,<br>investigators<br>(performance) | Outcome<br>assessors<br>(detection) |                                                                      |                                              |                                                         |                                                                                             |
| <b>Chertow et al 2002<sup>19</sup></b>        | Yes                              | Yes                       | No                                              | Yes                                 | Uneven loss to follow up<br>(28% intervention and<br>20% comparator) | Yes                                          | Yes, but industry<br>supported                          | Moderate RoB, due to<br>possible performance and<br>attrition bias                          |
| <b>Braun et al 2004<sup>20</sup> *</b>        | Not<br>described                 | No<br>information         | No                                              | Yes                                 | Uneven loss to follow up<br>(22% intervention and<br>34% comparator) | Yes                                          | Yes, no disclosures                                     | Moderate RoB, due to<br>possible performance and<br>attrition bias                          |
| <b>Asmus et al 2005<sup>21</sup><br/>**</b>   | Not<br>described                 | No<br>information         | No                                              | Yes                                 | Even loss to follow up                                               | Yes                                          | Yes, no disclosures                                     | Moderate RoB, due to<br>possible performance bias                                           |
| <b>Block et al 2005<sup>22</sup></b>          | Yes                              | Yes                       | No                                              | Yes                                 | Even loss to follow up                                               | Yes                                          | Yes, industry funded,<br>but investigator-<br>initiated | Moderate RoB due to<br>possible performance bias                                            |
| <b>Ferramosca et al<br/>2005<sup>23</sup></b> | Yes                              | No<br>information         | No                                              | Yes                                 | Even loss to follow up                                               | Yes                                          | Yes, no disclosures                                     | Moderate RoB due to<br>possible performance bias                                            |
| <b>Russo et al 2007<sup>24</sup></b>          | Not<br>described                 | Probably<br>adequate      | No                                              | Yes                                 | Even and small losses to<br>follow up                                | Yes                                          | Yes, no funding                                         | Moderate RoB due to<br>possible performance bias                                            |
| <b>Barreto 2008<sup>25</sup><br/>(BRiC)</b>   | Yes                              | Yes                       | No                                              | Yes                                 | Uneven loss to follow up<br>(38% intervention and<br>21% comparator) | Yes                                          | Yes, no disclosures                                     | Moderate RoB due to<br>possible performance and<br>attrition bias                           |
| <b>Qunibi 2008<sup>26</sup><br/>(CARE-2)</b>  | Yes                              | Yes                       | No                                              | Yes                                 | Uneven loss to follow up<br>(32% intervention and<br>43% comparator) | Yes                                          | Yes, but industry<br>provided study<br>medication       | Moderate RoB due to<br>possible performance and<br>attrition bias                           |
| <b>Kakuta 2011<sup>28</sup></b>               | Not<br>described                 | Yes                       | No                                              | Probably yes                        | Even loss to follow up                                               | Yes                                          | Yes, but industry<br>supported                          | Moderate RoB due to<br>possible performance bias                                            |
| <b>Toussaint 2011<sup>29</sup></b>            | Yes                              | Yes                       | No                                              | Yes                                 | Uneven loss to follow up<br>(22% intervention and<br>43% comparator) | Yes                                          | Yes, but industry<br>provided study<br>medication       | High RoB due to possible<br>performance and attrition<br>bias, plus industry<br>involvement |
| <b>Block 2012<sup>30</sup></b>                | Yes                              | Yes                       | Single blind<br>(participants)                  | Yes                                 | Uneven loss to follow up<br>(40% LC, 16% sevelamer,                  | Yes                                          | Yes, but industry<br>supported                          | Moderate RoB due to<br>possible attrition bias                                              |

|                                                      |                               |                |                |                |                                                                         |     |                                                  |                                                               |
|------------------------------------------------------|-------------------------------|----------------|----------------|----------------|-------------------------------------------------------------------------|-----|--------------------------------------------------|---------------------------------------------------------------|
|                                                      |                               |                |                |                | 26% calcium acetate and 29% comparator)                                 |     |                                                  |                                                               |
| <b>Di Iorio 2012</b> <sup>31</sup>                   | Yes                           | Yes            | No             | Yes            | Even loss to follow up                                                  | Yes | Yes, no industry support or grants               | Moderate RoB due to possible performance bias                 |
| <b>Kalil 2012</b> <sup>32</sup>                      | Not described                 | No             | No             | Yes            | Even loss to follow up                                                  | Yes | Yes, investigator-initiated grant from industry  | Moderate RoB due to possible performance bias                 |
| <b>Lemos 2013</b> <sup>33</sup>                      | Yes                           | Yes            | No             | Yes            | Uneven loss to follow up (42% statin, 31% sevelamer and 29% comparator) | Yes | Yes, industry funded, but investigator-initiated | Moderate RoB due to possible performance & attrition bias     |
| <b>Ohtake 2013</b> <sup>34</sup>                     | Yes (table of random numbers) | Yes            | No             | Yes            | Uneven loss to follow up (27% LC, 11% CaCO3)                            | Yes | Yes, no financial support                        | Moderate RoB due to possible performance & attrition bias     |
| <b>Seifert 2013</b> <sup>35</sup>                    | Not described                 | Yes            | Yes            | Yes            | No loss to follow up                                                    | Yes | Yes, but industry provided study medication      | Moderate RoB due to industry involvement                      |
| <b>Wada 2014</b> <sup>36</sup>                       | Yes                           | Yes            | No             | Yes            | Minimal loss to follow up                                               | Yes | Yes, no disclosures                              | Moderate RoB due to possible performance bias                 |
| <b>Russo 2015</b> <sup>37</sup>                      | Yes                           | Yes            | No             | Yes            | No loss to follow up                                                    | Yes | Yes, no industry sponsorship                     | Moderate RoB due to possible performance bias                 |
| <b>Wang 2015</b> <sup>38</sup>                       | Not described                 | No information | No information | Yes            | Probably no                                                             | Yes | Yes, no conflict of interest                     | Moderate RoB due to lack of reporting across multiple domains |
| <b>Zhang 2017</b> <sup>39</sup>                      | Yes                           | Yes            | No             | Yes            | Probably no                                                             | Yes | Yes, grant from hospital committee               | Moderate RoB due to possible performance bias                 |
| <b>Fujii 2018</b> <sup>40</sup>                      | Yes                           | Yes            | No             | Yes            | Uneven loss to follow up (23% intervention and 9% comparator)           | Yes | Yes, but industry funding and support            | Moderate RoB due to possible performance and attrition bias   |
| <b>Toussaint 2020</b> <sup>41</sup><br>(IMPROVE-CKD) | Yes                           | Yes            | Yes            | Yes            | Minimal loss to follow up                                               | Yes | Yes, but industry provided study medication      | Low RoB                                                       |
| <b>Isaka 2021</b> <sup>42</sup>                      | Yes                           | Yes            | No             | Yes            | Even loss to follow up                                                  | Yes | Yes, but industry supported                      | Moderate RoB due to possible performance bias                 |
| <b>Mune 1999</b> <sup>43</sup>                       | Not described                 | No information | No information | No information | No information                                                          | Yes | Yes                                              | Moderate RoB due to lack of reporting across multiple domains |

|                                          |               |                |                |                |                                                               |     |                                            |                                                                                              |
|------------------------------------------|---------------|----------------|----------------|----------------|---------------------------------------------------------------|-----|--------------------------------------------|----------------------------------------------------------------------------------------------|
| <b>Fu 2015<sup>45</sup></b>              | Not described | No information | No information | Yes            | Uneven loss to follow up (4% intervention and 20% comparator) | Yes | Yes                                        | Moderate RoB due to lack of reporting on domains and uneven losses to follow up              |
| <b>Lu 2016<sup>46</sup></b>              | Not described | No information | No information | No information | Even loss to follow up                                        | Yes | Yes, industry not involved in study design | Moderate RoB due to lack of reporting across multiple domains                                |
| <b>Ok 2016<sup>47</sup></b>              | Not described | No information | No information | Yes            | Even loss to follow up                                        | Yes | Yes, industry not involved in study design | Moderate RoB due to lack of reporting across multiple domains                                |
| <b>Voiculet 2016<sup>48</sup></b>        | Not described | No information | No information | No information | Minimal loss to follow up                                     | Yes | Yes                                        | Moderate RoB due to lack of reporting across multiple domains                                |
| <b>Kim 2017<sup>49</sup></b>             | Yes           | Yes            | No             | Yes            | Even loss to follow up                                        | Yes | Yes                                        | Moderate RoB due to possible performance bias                                                |
| <b>Masterson 2017<sup>50</sup></b>       | Yes           | Yes            | No information | Yes            | Uneven loss to follow up (8% intervention, 23% comparator)    | Yes | Yes, educational grant only                | Moderate RoB due to possible attrition bias                                                  |
| <b>Raggi 2011<sup>52</sup> (ADVANCE)</b> | Not described | No information | No             | Yes            | Even loss to follow up                                        | Yes | No, industry sponsored the study           | High RoB due to performance bias and industry involvement in the study design                |
| <b>Cruzado 2016<sup>54</sup></b>         | Not described | No information | No             | Yes            | No loss to follow up                                          | Yes | Yes, industry support                      | Moderate RoB due to lack of reporting across multiple domains, and possible performance bias |
| <b>Eddington 2021<sup>56</sup></b>       | Not described | No information | No             | Yes            | Minimal loss to follow up                                     | Yes | Yes, but industry funding                  | Moderate RoB due to lack of reporting across multiple domains, and possible performance bias |
| <b>Baker 1986<sup>57</sup></b>           | Not described | No information | Yes            | No information | Unclear losses to follow up                                   | Yes | Yes                                        | Moderate RoB due to lack of reporting across multiple domains                                |
| <b>Delanaye 2013<sup>59</sup></b>        | Not described | Unclear        | Yes            | Yes            | Even loss to follow up                                        | Yes | Yes                                        | Low RoB                                                                                      |
| <b>Samaan 2019<sup>61</sup></b>          | Yes           | Yes            | Yes            | Yes            | Minimal loss to follow up                                     | Yes | Yes                                        | Low RoB                                                                                      |

|                                         |               |                |                              |                |                                                                                     |     |                                                          |                                                                                           |
|-----------------------------------------|---------------|----------------|------------------------------|----------------|-------------------------------------------------------------------------------------|-----|----------------------------------------------------------|-------------------------------------------------------------------------------------------|
| <b>Anis 2020<sup>62</sup></b>           | Not described | Yes (IDS)      | Yes                          | Yes            | Minimal loss to follow up                                                           | Yes | Yes, industry support but no involvement in study design | Low RoB                                                                                   |
| <b>Zhou 2020<sup>133</sup> (RENEXC)</b> | Yes           | No             | Single blind (investigators) | No information | Even loss to follow up                                                              | Yes | Yes                                                      | Moderate RoB                                                                              |
| <b>Yazbek 2016<sup>63</sup></b>         | Yes           | Yes            | No                           | Yes            | Even loss to follow up                                                              | Yes | Probably yes, but study medication provided by industry  | Moderate RoB due to possible performance bias                                             |
| <b>Hashiba 2004<sup>64</sup></b>        | Not described | No information | No information               | Yes            | Unclear losses to follow up                                                         | Yes | Probably yes                                             | Moderate RoB due to lack of reporting across multiple domains                             |
| <b>Ariyoshi 2006<sup>66</sup></b>       | Probably yes  | No information | No information               | Yes            | Even loss to follow up                                                              | Yes | Yes                                                      | Moderate RoB due to lack of reporting across multiple domains                             |
| <b>Hashiba 2006<sup>67</sup></b>        | Probably yes  | No information | No information               | Yes            | Unclear losses to follow up                                                         | Yes | Probably yes                                             | Moderate RoB due to lack of reporting across multiple domains                             |
| <b>Torregrosa 2010<sup>68</sup></b>     | Not described | Yes            | No                           | Yes            | Uneven loss to follow up (17% intervention and 6% comparator)                       | Yes | Yes                                                      | Moderate RoB due to possible performance and attrition bias                               |
| <b>Toussaint 2010<sup>69</sup></b>      | Yes           | Yes            | Yes                          | Yes            | Minimal loss to follow up                                                           | Yes | Yes                                                      | Low RoB                                                                                   |
| <b>Okamoto 2014<sup>70</sup></b>        | Probably yes  | No information | No                           | No information | Unclear losses to follow up                                                         | Yes | Yes, but industry funding                                | Moderate RoB due to lack of reporting across multiple domains & possible performance bias |
| <b>Iseri 2019<sup>71</sup></b>          | Yes           | Yes            | No                           | Not described  | Uneven loss to follow up (25% intervention and 12.5% comparator)                    | Yes | Yes, industry support but no involvement in study design | Moderate RoB due to possible performance and attrition bias                               |
| <b>Tzanakis 2014<sup>74</sup></b>       | Yes           | No information | Yes                          | Yes            | No losses to follow up                                                              | Yes | Yes                                                      | Low RoB                                                                                   |
| <b>Sakaguchi 2019<sup>75</sup></b>      | Yes           | Yes            | No                           | Yes            | Uneven loss to follow up (27% intervention and 16% comparator); study stopped early | Yes | Yes                                                      | Low RoB                                                                                   |
| <b>Kurnatowska 2015<sup>76</sup></b>    | Yes           | Yes            | Yes                          | Yes            | Minimal loss to follow up, but uneven allocation!                                   | Yes | Yes                                                      | Low RoB                                                                                   |

|                                                  |               |                |                |                |                                                             |     |                                                                |                                                                                             |
|--------------------------------------------------|---------------|----------------|----------------|----------------|-------------------------------------------------------------|-----|----------------------------------------------------------------|---------------------------------------------------------------------------------------------|
| <b>Li 2017<sup>77</sup></b>                      | Probably yes  | No information | No information | No information | Unclear losses to follow up                                 | Yes | Yes                                                            | Moderate RoB due to lack of reporting across multiple domains                               |
| <b>Oikonomaki 2019<sup>78</sup></b>              | Probably yes  | No information | No             | No information | Even loss to follow up                                      | Yes | Yes, but industry provided study medication                    | Moderate RoB due to possible performance bias and lack of reporting across multiple domains |
| <b>De Vriese 2020<sup>79</sup></b><br>(Valkyrie) | Yes           | Yes            | No             | Yes            | No loss to follow up                                        | Yes | Yes                                                            | Moderate RoB due to possible performance bias                                               |
| <b>Witham 2020<sup>80</sup></b><br>(K4Kidneys)   | Yes           | Yes            | Yes            | Yes            | Even loss to follow up                                      | Yes | Yes                                                            | Low RoB                                                                                     |
| <b>Levy-Schousboe 2021<sup>81</sup></b>          | Not described | Yes            | Yes            | No information | Intention to treat analysis                                 | Yes | Yes, but industry funding                                      | Moderate RoB due to lack of reporting across multiple domains                               |
| <b>Yu 2016<sup>85</sup></b>                      | Probably yes  | No information | No information | No information | Minimal loss to follow up                                   | Yes | Yes.                                                           | Moderate RoB due to lack of reporting across multiple domains                               |
| <b>Saengpanit 2018<sup>86</sup></b>              | Yes           | Yes            | No             | Yes            | Minimal loss to follow up                                   | Yes | Yes                                                            | Moderate RoB due to possible performance bias                                               |
| <b>Djuric 2020<sup>87</sup></b>                  | Yes           | Yes            | Yes            | Yes            | Minimal loss to follow up                                   | Yes | Yes                                                            | Low RoB                                                                                     |
| <b>Bian 2021<sup>88</sup></b>                    | Not described | Not described  | Not described  | Not described  | No loss to follow up                                        | Yes | Yes, but industry support                                      | Moderate RoB due to lack of reporting across multiple domains                               |
| <b>Raggi 2020<sup>135</sup></b><br>(CaLIPSO)     | Yes           | Yes            | Yes            | Yes            | Uneven loss to follow up (22% intervention, 15% comparator) | Yes | No, industry sponsored and involved in study                   | High RoB due to attrition and industry involvement.                                         |
| <b>Gueiros 2019<sup>136</sup></b>                | Yes           | Yes            | No             | Yes            | Even loss to follow up                                      | Yes | Yes.                                                           | Low RoB                                                                                     |
| <b>Coyne 2019<sup>137</sup></b>                  | Probably yes  | No information | Single blind   | Yes            | Minimal loss to follow up                                   |     | Possibly. industry sponsored but authors directed study design | Moderate RoB                                                                                |
| <b>Liu 2020<sup>138</sup></b>                    | Yes           | Yes            | Yes            | Yes            | Even loss to follow up                                      | Yes | Yes, but industry support                                      | Low RoB                                                                                     |
| <b>Gao 2019<sup>139</sup></b>                    | Yes           | Yes            | No information | No information | Even loss to follow up                                      | Yes | Yes                                                            | Moderate RoB due to lack of reporting across multiple domains                               |

**Abbreviations:** risk of bias, RoB; Investigational Drug Service, IDS

**Note:** Only RCTs are included in this RoB table; non-RCTs were considered to increase RoB for that body of evidence
